# Supplementary material for: The Dutch Pregnancy Drug Register: Suitable to Study Paternal Drug Exposures?
Source: MDPI journal article supplement (doi:10.3390/ijerph20237107), 2023-11-24
Supplement: s1 [file s1]

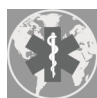

**Table S1.** Corresponding ATC codes for the drug classes.

|         |         |         |         |         |         |         |         |         |         |
|---------|---------|---------|---------|---------|---------|---------|---------|---------|---------|
| L04AA24 | L04AB04 | L04AA34 | D11AH04 | L04AA32 | L04AX01 | L04AA37 | L04AC02 | L04AA28 | L04AA26 |
| L04AC12 | L04AC08 | L04AB05 | P01BA01 | L04AD01 | L01AA01 | D11AH05 | L04AB01 | L04AA18 | L04AA45 |
| L04AB06 | P01BA02 | L04AB02 | L04AC13 | L04AA13 | L01BB02 | A07EC02 | L04AX03 | L04AA06 | L04AA06 |
| A07EC03 | D11AH02 | L04AC18 | L01XC02 | L01EJ01 | L04AC14 | L04AC10 | L04AA10 | A07EC01 | L04AD02 |
| D11AH01 | L04AC17 | L01BB03 | L04AC07 | L04AA29 | L04AA44 | L04AC05 | L04AA33 |         |         |

**Table S2.** Time to pregnancy in immunosuppressant group and control group.

|                          | Immunosuppressant group | Control group | Crude <i>P</i> value | Adjusted <i>P</i> value* |
|--------------------------|-------------------------|---------------|----------------------|--------------------------|
| <b>Time to pregnancy</b> |                         |               | 0.55                 | 0.66                     |
| ≤1 year                  | 77 (86.5%)              | 7966 (84.2%)  |                      |                          |
| >1 year                  | 12 (13.5%)              | 1493 (15.8%)  |                      |                          |
| Unplanned pregnancy**    | 3                       | 823           |                      |                          |
| Unknown**                | 0                       | 55            |                      |                          |

\* Adjusted for: maternal and paternal age, maternal and paternal country of birth, maternal and paternal education level of both father, maternal BMI, and gravidity. \*\*Not included in the analysis

**Table S3.** Fertility treatments performed in order to conceive in immunosuppressant group and control group.

|                                     | Immunosuppressant group | Control group | <i>P</i> value |
|-------------------------------------|-------------------------|---------------|----------------|
| <b>Fertility treatment</b>          |                         |               | 0.84           |
| No                                  | 81 (91.0%)              | 8582 (90.4)   |                |
| Yes                                 | 8 (9.0%)                | 915 (9.6%)    |                |
| Unplanned pregnancy*                | 3                       | 823           |                |
| Unknown*                            | 0                       | 17            |                |
| <b>Reduced fertility of the men</b> |                         |               | 0.43           |
| No                                  | 5 (62.5%)               | 677 (74.5%)   |                |
| Yes                                 | 3 (37.5%)               | 232 (25.5%)   |                |
| Unknown*                            | 0                       | 6             |                |

\*Not included in the analysis.
